# Supplementary material
Source: PubMed Central journal article supplement (PMC3423964)
Supplement: NIHMS376517-supplement-01.pdf [file NIHMS376517-supplement-01.pdf]

**Supplemental Table 1: Number of CNVs Observed in Probands, Parents, and CEU Controls by Standard Criteria.** Criteria for inclusion in this analysis are CNVs that encompass  $\geq 20$  SNP markers, are  $\geq 100$  kilobases in length, and cannot overlap more than 60% with a previously identified variant (20m100k60o). The frequency of CNVs is much greater in the patients than parents; frequency in parents is greater than controls (Kruskal-Wallis non-parametric test,  $p < 0.00005$ ).

| <b>Subjects</b>                         | <b>Total CNVs</b> | <b>Gains</b> | <b>Losses</b> |
|-----------------------------------------|-------------------|--------------|---------------|
| <b>Autism Probands, n = 69</b>          | <b>107</b>        | <b>87</b>    | <b>20</b>     |
| <b>Proband Frequency</b>                | <b>1.6</b>        | <b>1.3</b>   | <b>0.3</b>    |
| <b>Parents, n = 35</b>                  | <b>33</b>         | <b>19</b>    | <b>14</b>     |
| <b>Parent Frequency</b>                 | <b>0.94</b>       | <b>0.54</b>  | <b>0.4</b>    |
| <b>CEU Controls, n = 89<sup>#</sup></b> | <b>14</b>         | <b>9</b>     | <b>5</b>      |
| <b>CEU Frequency</b>                    | <b>0.16</b>       | <b>0.1</b>   | <b>0.05</b>   |

# of 90 CEU HapMap subject cell lines, one was excluded because it had previously been shown to harbor multiple rearrangements.

**Supplemental Table 2: Number of CNVs Observed in Probands, Parents, and CEU Controls by Standard Criteria.** Criteria for inclusion in this analysis are CNVs that encompass  $\geq 20$  SNP markers, are  $\geq 10$  kilobases in length, but do not overlap with any previously identified variant (20m10k0o). The frequency of CNVs is much greater in the patients than parents; frequency in parents is greater than controls (Kruskal-Wallis non-parametric test,  $p < 0.00005$ ).

| <b>Subjects</b>                         | <b>Total CNVs</b> | <b>Gains</b> | <b>Losses</b> |
|-----------------------------------------|-------------------|--------------|---------------|
| <b>Autism Probands, n = 69</b>          | <b>621</b>        | <b>530</b>   | <b>91</b>     |
| <b>Proband Frequency</b>                | <b>9</b>          | <b>7.7</b>   | <b>1.3</b>    |
| <b>Parents, n = 35</b>                  | <b>89</b>         | <b>60</b>    | <b>29</b>     |
| <b>Parent Frequency</b>                 | <b>2.5</b>        | <b>1.7</b>   | <b>0.8</b>    |
| <b>CEU Controls, n = 89<sup>#</sup></b> | <b>13</b>         | <b>6</b>     | <b>7</b>      |
| <b>CEU Frequency</b>                    | <b>0.14</b>       | <b>0.06</b>  | <b>0.08</b>   |

# of 90 CEU HapMap subject cell lines, one was excluded because it had previously been shown to harbor multiple rearrangements.
